# Supplementary material for: Mixing ratio dependent complex coacervation versus bicontinuous gelation of pectin with in situ formed zein nanoparticles
Source: Royal Society of Chemistry journal article supplement (doi:10.1039/c8sm00809d), 2018-01-01
Supplement: c8sm00809d1.pdf [file c8sm00809d1.pdf]

## Mixing Ratio Dependent Complex Coacervation Versus Bicontinuous Gelation Of Pectin And *In Situ* Formed Zein Nanoparticles

### Supplementary Information

#### Pectin- Zein Nanoparticle Mixing Ratio Dependent Complex Coacervation Versus Gelation

Priyanka Kaushik<sup>1</sup>, Kamla Rawat<sup>2,3\*</sup>, V. K. Aswal<sup>4</sup>, J. Kohlbrecher<sup>5</sup> and H. B. Bohidar<sup>1,2\*</sup>

<sup>1</sup>School of Physical Sciences, Jawaharlal Nehru University, New Delhi 110067, India

<sup>2</sup>Special Center for Nanosciences, Jawaharlal Nehru University, New Delhi 110067, India

<sup>3</sup>Inter University Accelerator Centre, New Delhi 110067, India

<sup>4</sup>State Physics Division, Bhabha Atomic Research Centre, Mumbai 400085, India

<sup>5</sup>Laboratory for Neutron Scattering, Paul Scherrer Institut, Villigen, Switzerland

\*Corresponding authors email: [bohi0700@mail.jnu.ac.in](mailto:bohi0700@mail.jnu.ac.in), [kamla.jnu@gmail.com](mailto:kamla.jnu@gmail.com)

Tel: +91 11 26704637, Fax: +91 11 2674 1837

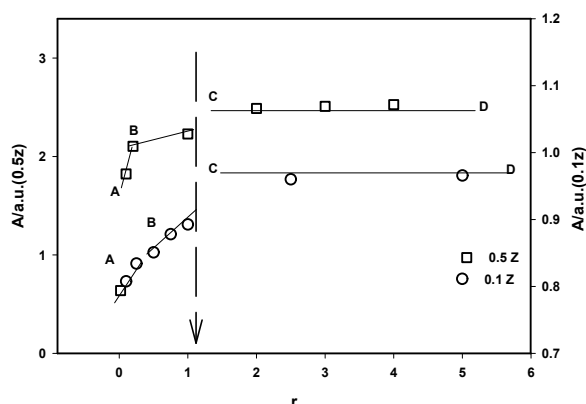

**Fig. S1.** Variation of absorbance of P-Z complex taken at 205 nm shown as function of mixing ratio. A-D are characteristic transition points depicting formation of complex at A, soluble complex at B, coacervate droplets at C, and gelation in the C-D region. See text for details.

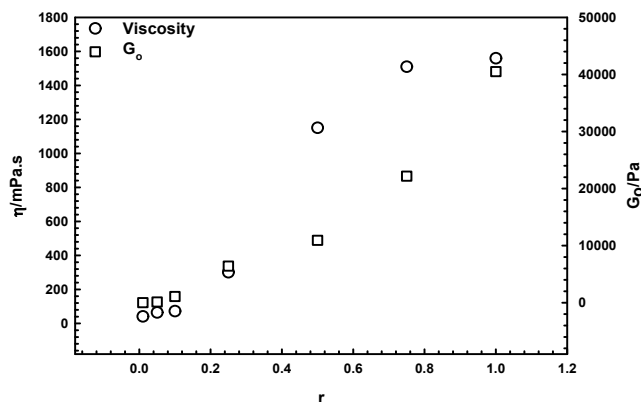

**Fig. S2.** Variation of viscosity and low frequency storage modulus  $G_0$  of Pectin-Zein complex as a function of mixing ratio (or Zein concentration) measured at 25 °C.

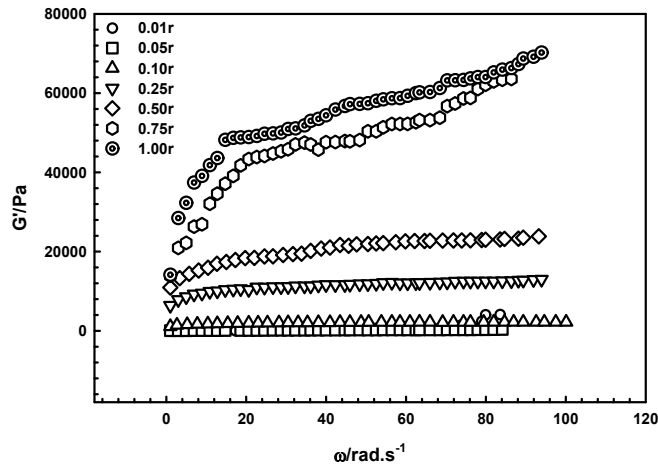

**Fig. S3.** Variation of elastic (storage) modulus  $G'$  of Pectin-Zein complex as a function of frequency at variable mixing ratio (with fixed pectin= 1% (w/v) measured at 25 °C).

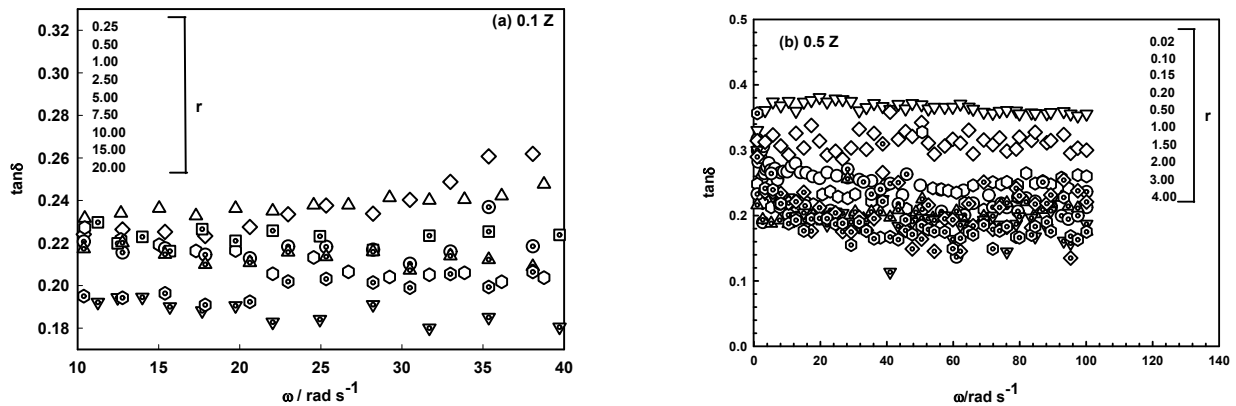

**Fig.S4:** Variation of  $\tan\delta$  of P-Z samples (coacervate and gel) (a) at 0.1% Z and (b) at 0.5% Z as a function of frequency. The measurements were performed at 25 °C using constant oscillation stresses of 6.3 Pa. Solid lines are guide to the eye.

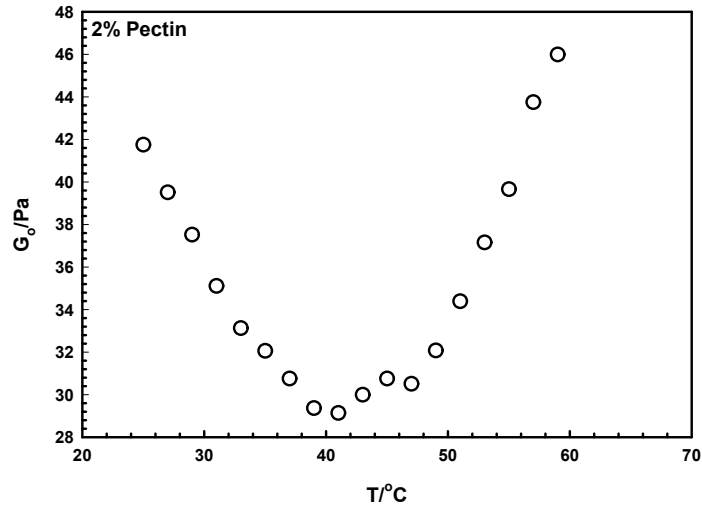

**Fig.S5:** Variation of low frequency storage modulus  $G_0$  of 2% (w/v) Pectin gel samples shown as function of temperature. Melting profiles were generated by using a temperature ramp of 1  $^{\circ}\text{C}/\text{min}$ . Sharp upturn in the data at 40  $^{\circ}\text{C}$  indicated drying of samples.

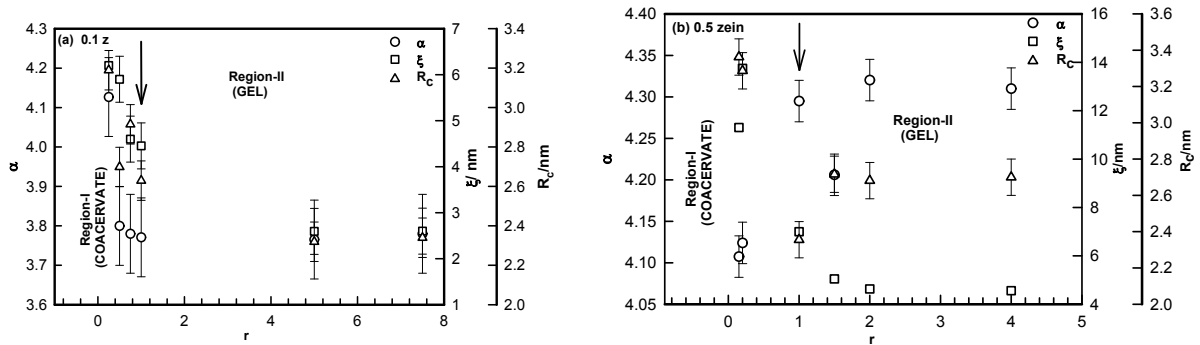

**Fig. S6:** Small angle neutron scattering intensity profile, fitting parameters (power-law exponent, and mesh size and cross-sectional radius) and cross-over wave vector of a P-Z (coacervate and gel) (a) 0.1 % and (b) 0.5 % (w/v) Zein at various mixing ratio measured at 25  $^{\circ}\text{C}$ .

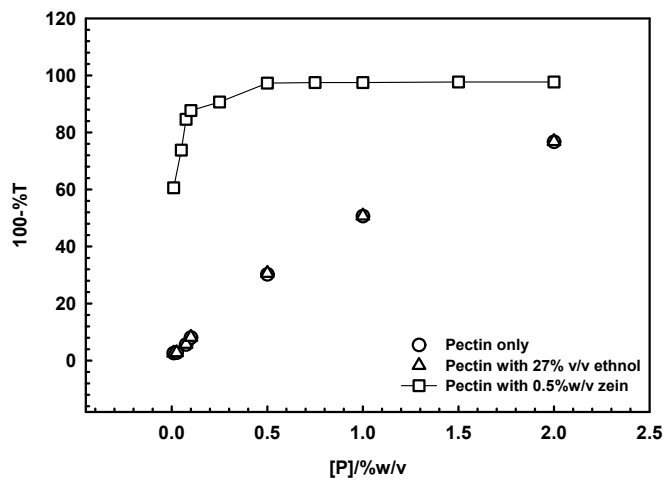

**Fig. S7:** Turbidity titration profile as a function of pectin concentration with 27%v/v ethanol and 0.5%w/v zein.

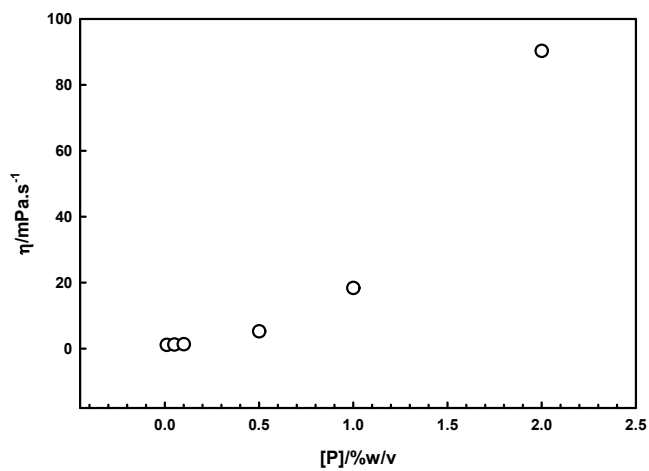

**Fig. S8:** Variation of viscosity for pectin concentration.
